# Supplementary material for: Salivary MicroRNA Signature for Diagnosis of Endometriosis
Source: J Clin Med. 2022 Jan 26;11(3):612. doi: 10.3390/jcm11030612 (PMC8836532; doi:10.3390/jcm11030612)
Supplement: Supplementary file 1 [file jcm-11-00612-s001.zip › Annexe S3 salivarev .xlsx]

## Sheet: Feuil1
miRNA	miRNA expression and accuracies	Log2FC	Log2FC-Standard Error	Regulation	AUC	F1-Score	Sensibility	Specificity	miRNA physipathology review	Previouly Published	Endometriosis	Other fields	Adhesion/Invasion	Proliferation	Apoptosis	Angiogenesis	Inflammation	Extracellular Matrix remodeling	Metastasis / Migration	Immune-response / Imuune escape	Neurogenic function	Link to pollutants	Other	Targets / Regulator	Pathways
hsa-miR-511-3p	hsa-miR-511-3p	0.27063	0.0685961	-	0.615	0.491	0.335	0.894	hsa-miR-511-3p	Yes	No	Allergic reactions, Asthma, Colorectal cancer, Hepatic sinusoidal obstruction, Prostrate cancer, Lung cancer, Breast cancer	X	X			X		X	X				MRC1, CCL2, Ptch1, AFF4, HMGA2	Akt, Hedgehog pathway
hsa-miR-34c-5p	hsa-miR-34c-5p	0.749193	0.119597	UP	0.642	0.844	0.858	0.426	hsa-miR-34c-5p	Yes	Yes	Cervical cancer, Nasopharyngeal carcinoma, Osteosarcoma, Chronic obstructive pulmonary disease, Acute myeloid leukemia stem cells, Aldosterone-induced fibrosis in kidney cells, Cancer pain, Glioma, Colorectal cancer, Laryngeal cancer, Ovarian cancer, HIV replication, Successful embyro implantation, Depression	X	X	X		X		X	X	X		EMT, Senescence of human aorta vascular smooth muscle cells , regulates calcium potassium channel, protect human primary dermal fibroblasts from UVB-induced premature senescence, osteogenic differenciation, chemosensitivity	Notch1, ALDOA, BMF, CCL2, nNOS, RAB27B, XBP1, FLOT2, Cav2.3 containing calcium channels, SATB2, Bcl-2, SIRT6, sGCβ1, MAPT, ATG4B, E2F3, KNJC4, c-Myc, NCOA1	JAK2/STAT3, ERK, NF-KB
hsa-miR-544a	hsa-miR-544a	0.264294	0.0829629	-	0.597	0.791	0.768	0.426	hsa-miR-544a	Yes	No	Endometrial cancer, Breast cancer, Gastric cancer, Lung cancer, Hepatocarcinoma, Atherosclerosis, Glioma	X	X		X			X		X		EMT	RECK, CDH1, GKN1, FBXW7, SELK, NEUROD4, Homebox A10	Wnt, PTEN, FOXP1, GSK3B
hsa-miR-520g-5p	hsa-miR-520g-5p	0.312318	0.0796568	-	0.587	0.744	0.684	0.489	hsa-miR-520g-5p	No	No
hsa-miR-6762-3p	hsa-miR-6762-3p	0.263792	0.0987867	-	0.443	0.728	0.716	0.17	hsa-miR-6762-3p	No	No
hsa-miR-591	hsa-miR-591	0.389739	0.116673	-	0.581	0.77	0.735	0.426	hsa-miR-591	Yes	No	Breast cancer, Hepatocellular carcinoma, Ovarian cancer, Osteoarthristis, Malignant pleural mesothelioma	X	X	X				X				Glycolysis, Chemoresistance	TCF4, FOSL2, HK2, IRAK3	Hippo - YAP/TAZ, PI3K / Akt
hsa-miR-5699-3p	hsa-miR-5699-3p	0.214342	0.0834382	-	0.392	0.488	0.381	0.404	hsa-miR-5699-3p	Yes	No	Squamous cell carcinoma
hsa-miR-4778-5p	hsa-miR-4778-5p	0.593876	0.163593	UP	0.583	0.598	0.465	0.702	hsa-miR-4778-5p	Yes	No	Type II diabetic nephropathy
hsa-miR-4677-3p	hsa-miR-4677-3p	0.962091	0.191614	UP	0.692	0.781	0.703	0.681	hsa-miR-4677-3p	Yes	No	Lung cancer, Gastric cancer, Glioma, Cervical cancer	X	X	X				X				Glycolysis	CDCA3, KNL1, ZEB1, CEMIP, SEC61G, MAGI2, CDK6	PI3K / Akt
hsa-miR-4635	hsa-miR-4635	0.196835	0.071811	-	0.597	0.822	0.832	0.362	hsa-miR-4635	No	No
hsa-miR-4328	hsa-miR-4328	0.0890414	0.088936	-	0.461	0.692	0.645	0.277	hsa-miR-4328	Yes	No	Keloids, Cataract, Lung cancer		X	X				X					Bcl-2, NAIP	PTEN
hsa-miR-133b	hsa-miR-133b	0.173773	0.0609017	-	0.369	0.46	0.355	0.383	hsa-miR-133b	484 results
hsa-miR-7111-3p	hsa-miR-7111-3p	0.18251	0.0828114	-	0.573	0.524	0.381	0.766	hsa-miR-7111-3p	No	No
hsa-miR-6814-5p	hsa-miR-6814-5p	0.316894	0.096073	-	0.571	0.435	0.29	0.851	hsa-miR-6814-5p	No	No
hsa-miR-6773-3p	hsa-miR-6773-3p	0.293951	0.115072	-	0.568	0.787	0.774	0.362	hsa-miR-6773-3p	No	No
hsa-miR-6739-3p	hsa-miR-6739-3p	0.278243	0.108219	-	0.432	0.338	0.226	0.638	hsa-miR-6739-3p	Yes	No	Septic shock, Neisseria meningitidis
hsa-miR-6133	hsa-miR-6133	-0.182902	0.0730133	-	0.61	0.836	0.858	0.362	hsa-miR-6133	Yes	No	Hepatic stellate cells						X							Akt, JNK, TGF beta
hsa-miR-6072	hsa-miR-6072	0.490467	0.169361	-	0.45	0.487	0.368	0.532	hsa-miR-6072	Yes	No	Hepatocellular carcinoma												HDGF
hsa-miR-5003-3p	hsa-miR-5003-3p	-0.395506	0.103287	-	0.616	0.653	0.529	0.702	hsa-miR-5003-3p	Yes	No	Breast cancer							X				EMT	Snail, E-Cadherine
hsa-miR-4510	hsa-miR-4510	-0.334039	0.113356	-	0.602	0.689	0.587	0.617	hsa-miR-4510	Yes	No	GIST, Hepatocellular carcinoma	X	X					X					APOC2, RAF1	Wnt, RAS/RAF/MEK/ERK
hsa-miR-4431	hsa-miR-4431	0.327014	0.121033	-	0.386	0.636	0.581	0.191	hsa-miR-4431	No	No
hsa-miR-4290	hsa-miR-4290	-0.646208	0.168497	-	0.613	0.443	0.29	0.936	hsa-miR-4290	Yes	No	Gastric cancer											Glycolysis, Chemosensitivity	PDK1
hsa-miR-371a-5p	hsa-miR-371a-5p	-0.288278	0.197756	-	0.551	0.217	0.123	0.979	hsa-miR-371a-5p	Yes	No	Recurrent pregnancy loss, Spontaneous delivery, Pancreatic cancer, Hepatocellular carcinoma, Colorectal cancer, Takotsubo, Seminomatous germ cell tumor, Trophoblastic diseases	X	X	X		X		X				Chemoresistance	XIAP, SRCIN1/PTN/Slug, CPPED1, BAG3	ErbB3, ERK
hsa-miR-34a-3p	hsa-miR-34a-3p	0.359298	0.0895023	-	0.582	0.75	0.697	0.468	hsa-miR-34a-3p	Yes	No	Pancreatic meningioma, Non-invasive muscle bladder cancer, Unexplained recurrent spontaneous abortion, Rheumatoid arthritis, Cervical cancer, Pulmonary artrial hypertension	X	X	X	X	X			X	X		prevent damages hypoxia induced	SMAD4, FRAT1 and BCL2, MMP2, MMP9, AMPA receptor, TNF alpha, sirtuin 1, TRAF5	STAT1, NF - KB
hsa-miR-2355-5p	hsa-miR-2355-5p	0.111257	0.0527005	-	0.58	0.812	0.819	0.34	hsa-miR-2355-5p	Yes	No	Intervertebral disc degeneration, Chondrosarcoma, Bladder cancer, Esophageal cancer, β-thalassemia, Triple negative breast cancer	X	X		X	X							ERRFI1, VEGFR2, LAMB3, SOCS2, KLF6, CBX5
hsa-miR-2114-5p	hsa-miR-2114-5p	-0.228811	0.0715815	-	0.605	0.694	0.594	0.617	hsa-miR-2114-5p	No	No
hsa-miR-19b-1-5p	hsa-miR-19b-1-5p	0.360533	0.101477	-	0.618	0.714	0.619	0.617	hsa-miR-19b-1-5p	Yes	Yes	Coronary syndrome, Bladder cancer		X	X	X							aspirine sensitivity	ABL2, VEGFA, EGFR2,CXCR4	PTEN
hsa-miR-8054	hsa-miR-8054	0.115412	0.0713795	-	0.41	0.657	0.606	0.213	hsa-miR-8054	No	No
hsa-miR-6879-5p	hsa-miR-6879-5p	-0.230884	0.103982	-	0.607	0.623	0.49	0.723	hsa-miR-6879-5p	Yes	No	Pancreatic cancer
hsa-miR-6827-3p	hsa-miR-6827-3p	-0.173901	0.0778501	-	0.606	0.514	0.361	0.851	hsa-miR-6827-3p	Yes	No	Alzheimer's
hsa-miR-548b-5p	hsa-miR-548b-5p	0.15306	0.0735589	-	0.389	0.332	0.226	0.553	hsa-miR-548b-5p	Yes	No	Astrocytoma								X				IFN gamma
hsa-miR-548ah-3p	hsa-miR-548ah-3p	-0.134057	0.124933	-	0.575	0.785	0.768	0.383	hsa-miR-548ah-3p	Yes	No	Diabetic nephropathy
hsa-miR-514a-5p	hsa-miR-514a-5p	0.184879	0.0791296	-	0.607	0.623	0.49	0.723	hsa-miR-514a-5p	Yes	No	Nasopharyngeal cancer, Hepatocellular carcinoma, Adrenocortical carcinoma, Pulmonary thrombo embolism	X	X					X					ELAVL1, MRPS18A, C22orf46
hsa-miR-497-5p	hsa-miR-497-5p	0.182433	0.082373	-	0.403	0.43	0.316	0.489	hsa-miR-497-5p	117 results
hsa-miR-4746-5p	hsa-miR-4746-5p	-0.203943	0.092497	-	0.597	0.667	0.555	0.638	hsa-miR-4746-5p	Yes	No		-	-	-	-	-	-	-	-	-	-	Cervical cancer HPV induced progression		EMT related pathway
hsa-miR-379-5p	hsa-miR-379-5p	0.139901	0.0712253	-	0.578	0.829	0.858	0.298	hsa-miR-379-5p	Yes	No		X	X	X	-	-	-	X	-	X	-	EMT	LIN28B / Let - 7, Endothelin 1, ROR1, MGST1, YBX1, CD97, MDM2, Bcl-2, ARRB1	ERK, PI3K / AKT
hsa-miR-28-3p	hsa-miR-28-3p	0.49029	0.12191	-	0.55	0.877	0.994	0.106	hsa-miR-28-3p	Yes	No	Alzheimer's, Nasopharyngeal cancer, Gastric cancer, Colorectal cancer, Pulmonary embolism, HTLV1, Osteosarcoma, COVID-19, Sporadic amyotrophic lateral sclerosis, Fetal growth restriciton and preeclampsia	X	X	X				X				HTLV1 replication, osteogenic differentiation	ILF-1 beta, SNAIL, ADAM17
hsa-miR-16-1-3p	hsa-miR-16-1-3p	-0.267986	0.0983976	-	0.626	0.712	0.613	0.638	hsa-miR-16-1-3p	Yes	No	Non-small cell lung cancer, Osteosarcoma, Breast cancer, Gastric cancer, Cataract, Spondyloarthritis	X	X	X				X					TWIST1, PGK1, TFAP4, gp130
hsa-miR-1224-3p	hsa-miR-1224-3p	-0.164177	0.0830296	-	0.581	0.437	0.29	0.872	hsa-miR-1224-3p	Yes	No	Lung cancer, Breast cancer, Glioma, Renal cancer	X	X					X				Glycolysis, EMT	ETV1, PGM5, PLK1, HMGXB3	MAPK, PI3K/AKT, and NF-κB
hsa-miR-802	hsa-miR-802	0.217905	0.0790807	-	0.372	0.522	0.426	0.319	hsa-miR-802	Yes	No	Obesity, Type II diabetes mellitus, Colorectal cancer, Inflammatory bowel disease, Cervical cancer, Oral squamous cell carcinoma, Hepatocellular carcinoma, Melanoma, Nonalcoholic fatty acid liver disease, Gastric cancer, Cholesteatoma, Alzheimer's, Osteosarcoma, Ovarian cancer, Tongue squamous cell carcinoma, Down syndrome	X	X	X		X		X	X		X	Insuline transcription and secretion, EMT, alleviates lipopolysaccharide-induced acute lung injury, causes nephropathy, enterocyte differentiation	NeuroD1, Fzd5, RAN / EGFR, SOCS5, BTF3, MET, Peli2, FGFR1, SIX4, PD-1, IFN, REDD1, FLOT2, HSP60, UBN2, RUNX3, ARPP19, MEF2C, BMI1, RAB23, ZNF521, hAT(1)R, Hnf1b, SMARCE1, YWHAZ, FoxM1, Sirtuin6, SRSF9, p27, MAP2K4, caveolin-1, menin, oral lychen planus	NF-KB, Wnt - 4 / Beta catenin, PI3K / Akt, AMPK, ERK, PTEN, Rnd3
hsa-miR-744-5p	hsa-miR-744-5p	0.274437	0.103691	-	0.662	0.656	0.516	0.809	hsa-miR-744-5p	Yes	No	Sjogren syndrome, Epithelial ovarian cancer, Papillary thyroid carcinoma, Multiple myeloma, Colorectal cancer, Lung adenocarcinoma, Pancreatic neuroendocrine tumor, Breast cancer, Pituitary adenoma, Glioblastoma, Prostate cancer	X	X	X		X		x				EMT, Glycolysis	Pellino3, ARF1, lncRNA HOTTIP, HNRNPC, NFIX, SPET2, MAFG, BCL9, THBS2, eNOS, HOXB8, RFC2, UBE2L3, CDCA4	SOX12/Wnt/β-Catenin, p53, TGF - beta
hsa-miR-6894-3p	hsa-miR-6894-3p	0.137814	0.0906569	-	0.609	0.699	0.6	0.617	hsa-miR-6894-3p	Yes	No	Multiple myeloma
hsa-miR-6875-3p	hsa-miR-6875-3p	0.133749	0.0800561	-	0.441	0.284	0.181	0.702	hsa-miR-6875-3p	Yes	No	Hepatocellular carcinoma	X	X					X					BTG2/FAK	Akt
hsa-miR-6870-5p	hsa-miR-6870-5p	0.433466	0.166352	-	0.559	0.835	0.884	0.234	hsa-miR-6870-5p	Yes	No	Triple negative breast cancer
hsa-miR-6810-3p	hsa-miR-6810-3p	-0.215	0.105	-	0.612	0.545	0.394	0.83	hsa-miR-6810-3p	No	No
hsa-miR-6795-3p	hsa-miR-6795-3p	0.26755	0.0924523	-	0.578	0.429	0.284	0.872	hsa-miR-6795-3p	No	No
hsa-miR-6729-5p	hsa-miR-6729-5p	0.268514	0.137952	-	0.534	0.827	0.877	0.191	hsa-miR-6729-5p	Yes	No	Osteogenesis
hsa-miR-6718-5p	hsa-miR-6718-5p	0.111	0.076	-	0.576	0.816	0.832	0.319	hsa-miR-6718-5p	Yes	No	Acute myocardial infection													MAPK
hsa-miR-618	hsa-miR-618	0.0695134	0.059926	-	0.446	0.774	0.806	0.085	hsa-miR-618	Yes	No	Gastric cancer, Prostate cancer, Hirschsprung disease, Postmenopausal osteoporosis, Colorectal cancer, Anaplastic thyroid cancer, Follicular lymphoma, Osteosarcoma, Breast cancer, Type 1 diabetes, Bladder cancer	X	X					X				Osteoclastogenesis, Chemoresistance	TIMP - 1 / MMP, FOXP2, Bcl2, KLF12, XIAP, CBX8, MAEL	TGF - beta, TLR-4/MyD88/NF-κB, PI3K / Akt, PTEN
hsa-miR-548an	hsa-miR-548an	-0.132694	0.0797734	-	0.588	0.588	0.452	0.723	hsa-miR-548an	Yes	No	Pancreatic cancer													HIF-1alpha
hsa-miR-520a-5p	hsa-miR-520a-5p	-0.114265	0.0731489	-	0.591	0.388	0.245	0.936	hsa-miR-520a-5p	Yes	No	Lung cancer, Breast cancer, Complications of hypertensive pregnancy, Chronic myelogenous leukemia, Respiratory syncitial virus	X	X	X				X	X			Chemoresistance, Metabolic regulation	CDK4, ORMDL3, GOT-2	STAT3
hsa-miR-4780	hsa-miR-4780	-0.152356	0.104328	-	0.613	0.692	0.587	0.638	hsa-miR-4780	No	No
hsa-miR-4755-3p	hsa-miR-4755-3p	-0.202998	0.0917928	-	0.595	0.809	0.806	0.383	hsa-miR-4755-3p	Yes	No	Breast cancer
hsa-miR-4433b-5p	hsa-miR-4433b-5p	0.135451	0.090337	-	0.424	0.265	0.168	0.681	hsa-miR-4433b-5p	Yes	No	Breast cancer, Tuberculosis
hsa-miR-4330	hsa-miR-4330	0.78847	0.209164	UP	0.393	0.409	0.297	0.489	hsa-miR-4330	No	No
hsa-miR-4283	hsa-miR-4283	0.338118	0.132205	-	0.477	0.521	0.4	0.553	hsa-miR-4283	No	No
hsa-miR-421	hsa-miR-421	0.465735	0.111035	-	0.596	0.72	0.639	0.553	hsa-miR-421	Yes	No		-	X	X	-	X	-	-	-	X	X	Therapeutic resistance (prostate cancer) / Regulating human melanocyte survival	ATM, ZFAS1, BTG1, HOPX, Caspase 3, TLR4, Chk2, MTAT1, receptor‑interacting serine/threonine kinase 1	insulin signaling pathway, PI3K / AKT, MAPK, FOXO, Wnt / beta cat, mTor, p53, JAK2/STAT3
hsa-miR-365b-3p	hsa-miR-365b-3p	0.172564	0.0905115	-	0.444	0.391	0.271	0.617	hsa-miR-365b-3p	Yes	No	Atherosclerosis, Retinoblastoma, Smoking, Lung cancer, Endothelial dysfunction in obese children		X	X				X					ADAMST1, PAX6, PPP5C
hsa-miR-361-5p	hsa-miR-361-5p	0.394089	0.121456	-	0.533	0.835	0.897	0.17	hsa-miR-361-5p	Yes	No
hsa-miR-3118	hsa-miR-3118	-0.416358	0.178671	-	0.572	0.541	0.4	0.745	hsa-miR-3118	Yes	No
hsa-miR-25-5p	hsa-miR-25-5p	-0.273751	0.104115	-	0.578	0.829	0.858	0.298	hsa-miR-25-5p	Yes	No		X	X	X	-	-	-	X	-	-	-	Cell differenciation	NEDD9, ABCA1, NEGR, protein kinase C ζ	JAK / STAT, AMPK, Wnt/β-catenin, TGF-β, MAPK/ERK, PTEN, AKT
hsa-miR-204-3p	hsa-miR-204-3p	0.111104	0.0789239	-	0.435	0.346	0.232	0.638	hsa-miR-204-3p	Yes	No	Alzheimer's, Bladder cancer, Drug addiction, Retinoblastoma, Non-small cell lung cancer, Osteosarcoma, Colorectal cancer, Ovarian cancer, Oral squamous cell carcinoma, Glioma, Clear-cell renal carcinoma, Hepatocellular carcinoma, Papillary thyroid cancer, Gastric cancer, Familial mediterranean fever	X	X	X		X		X		X		Cardiomyocytes autophagy, Glycolysis, LPS induced lung injury, EMT	Nox4, LDHA, Sema3A, Plxna4, FN1, APC2, αV/β3-integrin/FAK, HMGA2, CDC23, SULF2, KIF2A, Bdkrb2, TPT1	Wnt / Beta catenin, Kras, ErbB2, IGFBP2/AKT/Bcl2, PI3Kgamma
hsa-miR-149-5p	hsa-miR-149-5p	0.394223	0.117154	-	0.602	0.689	0.587	0.617	hsa-miR-149-5p	134 results
hsa-miR-96-3p	hsa-miR-96-3p	-0.201144	0.0781241	-	0.6	0.713	0.626	0.574	hsa-miR-96-3p	Yes	No	Papillary thyroid cancer							X					SDHB	Akt, mTOR
hsa-miR-873-5p	hsa-miR-873-5p	0.102856	0.0758511	-	0.407	0.246	0.155	0.66	hsa-miR-873-5p	Yes	No	Papillary thyroid cancer, Nonalcoholic fatty liver disease, Colorectal cancer, Non-small cell lung cancer, Gastric cancer, Breast cancer, Tongue squamous cell carcinoma, Hepatocellular cancer, Autism, Cervical cancer,Iinfantile hemangioma	X	X	X		X		X		X		Cardioprotection, EMT	CXCL16, mitochondrial GNMT-Complex II interface, XIAP, JMJD8, ZEB1/2, MCL1, FOXM1, Keap1/Nrf2, Gli1, IGF2BP1, MYC, LEF1 and CD44. MYC, DCST1-AS1, SEC11A, SPC18, DLC1, ARID1B, SHANK3, ADNP2, ANK2 and CHD8, HDGF, TUCS3, HNRNPK	AMPK, NF-KB, PI3K/AKT and ERK1/2 , IGF1
hsa-miR-6839-5p	hsa-miR-6839-5p	-0.267481	0.113807	-	0.6	0.612	0.477	0.723	hsa-miR-6839-5p	Yes	No	Chondrosarcoma												VEGFA, CXCL12, BCL2L14	MAP4K3
hsa-miR-6809-5p	hsa-miR-6809-5p	0.100332	0.0813206	-	0.57	0.721	0.652	0.489	hsa-miR-6809-5p	Yes	No	Hepatoma		X										FLOT1	Erk1/2, p38, JNK, and NF-κB/p65
hsa-miR-6726-5p	hsa-miR-6726-5p	0.610312	0.195138	UP	0.557	0.851	0.923	0.191	hsa-miR-6726-5p	No	No
hsa-miR-655-5p	hsa-miR-655-5p	0.589073	0.230004	UP	0.616	0.534	0.381	0.851	hsa-miR-655-5p	No	No
hsa-miR-634	hsa-miR-634	-0.298998	0.129271	-	0.571	0.435	0.29	0.851	hsa-miR-634	Yes	No	Breast cancer, Glioma, Cervical cancer, Gastric cancer, Hepatocellular carcinoma, Cutaneous squamous cell carcinoma, Ovarian cancer, Lung adnocarcinoma, Hypertension, Pancreatic cancer, Osteoarthritis	X	X	X			X	X				Radioresistance, chemosensitivity	CYR61, TPD52, JAG1, Rab1A, DHX33, PRKCA, ZBTB20, GRB2, HSPA2	STAT3, Raf-ERK, EGFR, Ras / MAPK, mTOR, Wnt4/β-catenin
hsa-miR-630	hsa-miR-630	0.097415	0.0725729	-	0.56	0.571	0.439	0.681	hsa-miR-630	91 results
hsa-miR-629-5p	hsa-miR-629-5p	0.267399	0.0877889	-	0.532	0.752	0.723	0.34	hsa-miR-629-5p	Yes	No	Hepatocellular carcinoma, Lung adenocarcinoma, Nicotin metabolism, Breast cancer, Osteosarcoma, Colorectal cancer, Depressive disorders	X	X	X				X	X			Chemosensitivity	SFRP2, PPWD1, CXXC4, IL2RB, TET3, LRP6, CAV1	Wnt / Beta catenin, Akt
hsa-miR-627-5p	hsa-miR-627-5p	0.426522	0.124255	-	0.564	0.749	0.703	0.426	hsa-miR-627-5p	Yes	No	Glioma,Oral squamous cell carcinoma, Hepatocellular carcinoma	X	X	X				X				insulin tolerance, liver damage, glucose and lipid metabolism and reduced lipid deposition	NR2C2, YBX2, BCL3/CCND1, FTO
hsa-miR-5589-5p	hsa-miR-5589-5p	-0.433509	0.154627	-	0.578	0.354	0.219	0.936	hsa-miR-5589-5p	Yes	No	Hepatocellular carcinoma												FOXO1
hsa-miR-5585-5p	hsa-miR-5585-5p	-0.066852	0.0824977	-	0.466	0.519	0.4	0.532	hsa-miR-5585-5p	No	No
hsa-miR-5579-5p	hsa-miR-5579-5p	0.172032	0.0733985	-	0.439	0.485	0.368	0.511	hsa-miR-5579-5p	No	No
hsa-miR-550b-3p	hsa-miR-550b-3p	0.0931558	0.105176	-	0.581	0.627	0.503	0.66	hsa-miR-550b-3p	Yes	No	Monozygotic twins
hsa-miR-548ap-5p/548j-5p	hsa-miR-548ap-5p/548j-5p	0.158202	0.209925	-	0.542	0.5	0.361	0.723	hsa-miR-548ap-5p/548j-5p	Yes	No
hsa-miR-526a	hsa-miR-526a	-0.675346	0.225261	-	0.571	0.435	0.29	0.851	hsa-miR-526a	Yes	No	Hepatocellular carcinoma, Preeclampsia, PPROM, Endometrial cancer, Pregnancy related complications	X	X	X					X			EMT	CYLD, RIG-I, PAK7, IQGAP1	NF-KB
hsa-miR-520e	hsa-miR-520e	0.320437	0.112818	-	0.611	0.754	0.69	0.532	hsa-miR-520e	Yes	No	Non-small cell lung cancer, Hepatocellular carcinoma, Lynch syndrome, Breast cancer, Colorectal cancer, Glioma, Severe obesity	X	X	X				X	X				EphA2, CyclinD1, CD46, AEG1, FGF19, Zbtb7a, Rab11A	TGF beta, MAPK, Wnt/GSK-3β/β-catenin, NIK/p-ERK1/2/NF-κB
hsa-miR-520c-5p	hsa-miR-520c-5p	0.285549	0.709236	-	0.563	0.801	0.806	0.319	hsa-miR-520c-5p	Yes	No	Cancer stem cells of gastric cancer
hsa-miR-5194	hsa-miR-5194	0.12859	0.069712	-	0.408	0.628	0.561	0.255	hsa-miR-5194	Yes	No	Gliomas											attenuates fatty acid oxidation in hepatocytes	PGC1B, ABCD1, ADIPOR1 and PPARA
hsa-miR-518a-5p	hsa-miR-518a-5p	-0.161168	0.163173	-	0.567	0.511	0.368	0.766	hsa-miR-518a-5p	Yes	No	Diffuse large B-cell lymphoma, Ovarian cancer, Periodontis, Colorectal cancer, Myocardial infarction, Glioblastoma, Rheumatoid arthritis	X	X	X		X		X					CCR6, GZMBn IL17RD, CCL2	JAK/STAT, Fas, HIF-1α/MAPK
hsa-miR-4790-5p	hsa-miR-4790-5p	-0.0964593	0.0732789	-	0.546	0.349	0.219	0.872	hsa-miR-4790-5p	No	No
hsa-miR-4772-3p	hsa-miR-4772-3p	0.21462	0.097739	-	0.412	0.385	0.271	0.553	hsa-miR-4772-3p	Yes	No	Mesothelioma, Colon cancer								X				IKZF2
hsa-miR-4671-5p	hsa-miR-4671-5p	-0.403171	0.145614	-	0.563	0.522	0.381	0.745	hsa-miR-4671-5p	No	No
hsa-miR-451b	hsa-miR-451b	0.155604	0.0628237	-	0.399	0.355	0.245	0.553	hsa-miR-451b	Yes	No	Gastric cancer		X	X	X			X					CASP3, Bcl-2, PCNA, Bax	PI3K / Akt
hsa-miR-450a-5p	hsa-miR-450a-5p	0.0933412	0.0624306	-	0.552	0.721	0.658	0.447	hsa-miR-450a-5p	Yes	No	Glioma, Colorectal cancer, Gastric cancer	X	X	X	X			X				Insulin resistance, Chemosensitivity, Radiation sensitivity, Vascular mimicry, Promotes adipogenic differenciation, osteogenic differenciation	CREB1, EGFR, DUSP10, SOX2, WISP2, RUNX2	eNOS/AKT, SAPK / JNK, STAT, AKT/GSK-3β
hsa-miR-4474-5p	hsa-miR-4474-5p	-0.274172	0.121317	-	0.597	0.474	0.323	0.872	hsa-miR-4474-5p	No	No
hsa-miR-4446-5p	hsa-miR-4446-5p	0.0876611	0.0643612	-	0.588	0.573	0.432	0.745	hsa-miR-4446-5p	No	No
hsa-miR-433-5p	hsa-miR-433-5p	0.170623	0.11763	-	0.55	0.41	0.271	0.83	hsa-miR-433-5p	Yes	No	Acute vertigo / Posterior stroke, PCOS		X	X										PIK3CD
hsa-miR-4329	hsa-miR-4329	0.170739	0.0707764	-	0.384	0.559	0.471	0.298	hsa-miR-4329	Yes	No	Acute myocardial infarction
hsa-miR-3918	hsa-miR-3918	0.178686	0.0828562	-	0.594	0.704	0.613	0.574	hsa-miR-3918	Yes	No	Hepatocellular carcinoma, Gastric cancer	X	X	X				X					Bcl2, TRIM37
hsa-miR-378a-3p	hsa-miR-378a-3p	0.811461	0.258163	UP	0.554	0.484	0.342	0.766	hsa-miR-378a-3p	107 results
hsa-miR-376b-3p	hsa-miR-376b-3p	0.146389	0.0917173	-	0.559	0.835	0.884	0.234	hsa-miR-376b-3p	Yes	No		X	X	X	-	X	-	X	-	-	-	-	MEG3, KLF15, KLF12, FOXP2 / KDM5B / SNHG1, SULF1,	YAP1, Wnt/β-catenin
hsa-miR-33a-5p	hsa-miR-33a-5p	0.328922	0.133514	-	0.551	0.844	0.91	0.191	hsa-miR-33a-5p	Yes	No	Lung cancer, Melanoma, Type 2 diabetes, Gastric cancer, Glioblastoma, Hepatocellular carcinoma, Osteoarthritis disease, Infantile hemangioma, Vascular calcification, Gestational diabetes mellitus, Colorectal cancer, Tongue squamous cell carcinoma, Breast cancer, Pancreatic ductal carcinoma, Multiple myeloma, Osteosarcoma, Hypertension	X	X	X	X	X		X				Cardiomyocyte differenciation, Sensitivity to immunotherapy PD-L1, EMT, osteogenic differenciation, suppresses VSMCs calcification, cholesterol efflux, EMT	Twist1, SNAI2, NOMO1, CDK7, CDK6, ZEB1, SP1/CX43, E2F7, SATB2, DKK1, METTL3, KPNA4, ABCA1, XBP1, MTHFD2, eIF5A2, Rap2A, PIM1, SIRT6, AXL	Wnt/β-catenin, PI3K/AKT/mTOR, PTEN, TGF-beta, HIF1α/NF‑κB, YAP/TAZ / EGFR
hsa-miR-3187-3p	hsa-miR-3187-3p	-0.199593	0.164271	-	0.558	0.602	0.477	0.638	hsa-miR-3187-3p	Yes	No	Colorectal cancer, Lung cancer, Hypertrophic scarring fibroblasts, Head and neck squamous carcinoma, Melanoma	X	X	X	X			X	X				ASXL1, GAB1, PER2	Wnt/β-catenin
hsa-miR-3160-5p	hsa-miR-3160-5p	-0.187736	0.0902755	-	0.579	0.477	0.329	0.83	hsa-miR-3160-5p	Yes	No	Prostate cancer, Breast cancer		X										F-box, Fbxw8
hsa-miR-3157-5p	hsa-miR-3157-5p	0.0257044	0.0919776	-	0.443	0.546	0.439	0.447	hsa-miR-3157-5p	No	No
hsa-miR-3124-5p	hsa-miR-3124-5p	0.00548595	0.0881706	-	0.552	0.681	0.594	0.511	hsa-miR-3124-5p	No	No
hsa-miR-30b-3p	hsa-miR-30b-3p	0.152359	0.0951309	-	0.421	0.256	0.161	0.681	hsa-miR-30b-3p	Yes	No	Ovarian cancer, Hepatocellular carcinoma, Lung injury, Dental pulp cells, Glioma, Glioblastoma, Gastric cancer	X	X					X				EMT, odontoblast differenciation, attenuates autophagy, chemosensitivity, regulator of androgen receptor	CTHRC1, TRIM27, SAA3, RUNX2, ULK1, RECK	PI3K / Akt
hsa-miR-26a-1-3p	hsa-miR-26a-1-3p	0.265874	0.101711	-	0.401	0.311	0.206	0.596	hsa-miR-26a-1-3p	Yes	No	Metastatic kidney cancer
hsa-miR-2355-3p	hsa-miR-2355-3p	0.101157	0.0733481	-	0.558	0.87	0.968	0.149	hsa-miR-2355-3p	Yes	No	Cardiac arrythmia, Diabetic nephropathy, Pancreatic cancer, Lung cancer	X	X				X	X					NLRP3, IL6ST, TRIM29, ZCCHC14	STAT3
hsa-miR-219b-5p	hsa-miR-219b-5p	0.221387	0.0920834	-	0.377	0.189	0.116	0.638	hsa-miR-219b-5p	No	No
hsa-miR-211-3p	hsa-miR-211-3p	0.0215273	0.0939863	-	0.569	0.589	0.458	0.681	hsa-miR-211-3p	Yes	No	Lung cancer, Synoviocytes, Bladder cancer, Breast cancer, Colorectal cancer, Oral squamous cell carcinoma	X	X	X				X	X			effects of LPS on endoplasmic reticulum stress and CHOP activation in cultured human skin fibroblasts, EMT	ZNF217, TNF alpha, ESM1, TUCS7, MAFG	TP53
hsa-miR-181a-3p	hsa-miR-181a-3p	-0.121534	0.0966982	-	0.455	0.517	0.4	0.511	hsa-miR-181a-3p	Yes	No	Atherosclerosis, Acute myeloid leukemia, Oral squamous cell carcinoma			X		X						Osteogenic differenciation, ERS, muscle atrophy	NEMO, BMP10	NF-KB
hsa-miR-15b-3p	hsa-miR-15b-3p	0.195842	0.0842704	-	0.606	0.803	0.787	0.426	hsa-miR-15b-3p	Yes	No	Gastric cancer, Endometrial cancer	X	X					X		X			DYNLT1/Caspase-3/Caspase-9, KLF2	Wnt
hsa-miR-155-5p	hsa-miR-155-5p	0.219218	0.116549	-	0.461	0.407	0.284	0.638	hsa-miR-155-5p	467 results
hsa-miR-146b-5p	hsa-miR-146b-5p	0.0765406	0.151977	-	0.448	0.632	0.555	0.34	hsa-miR-146b-5p	Yes	No		X	X	-	-	X	-	X	X	X	-	Ameliorates Neonatal Hypoxic Ischemic Encephalopathy / EMT / Treatment and radiosensitivity / Involved in recurrent spontaneous abortion / Intestinal mucosal homeostasis in Crohn	SMARCA5, IRAK1, TRAF6, TAK1, PDHB, STC1, IL 17, Robo1, MMP16, HuR/lincRNA-p21, Zinc and ring finger 3, Smad4, TLR4, AUF1 / ZEB1, BTG2, CLDN11/NUMB, NF2, EGFR	TGF-beta, NF-KB, JNK, Wnt / Beta cat, PI3K / AKT
